# Supplementary material for: Gold micromeshes as highly active electrocatalysts for methanol oxidation reaction
Source: Royal Society of Chemistry journal article supplement (doi:10.1039/c7ra02505j), 2017-01-01
Supplement: c7ra02505j1.pdf [file c7ra02505j1.pdf]

## Electronic Supplementary Information

### Gold micromeshes as highly active electrocatalysts for methanol oxidation reaction

Jingying Sun,<sup>a</sup> Feng Wang,<sup>a</sup> Yuan Liu,<sup>a</sup> Yizhou Ni,<sup>a</sup> Haiqing Zhou,<sup>a</sup> Chuan Fei Guo<sup>\*b</sup>, and Shuo Chen<sup>\*a</sup>

a. Department of Physics & The Texas Center for Superconductivity, University of Houston, Houston, Texas 77204, United States. E-mail: schen34@uh.edu

b. Department of Materials Science & Engineering, South University of Science & Technology of China, Shenzhen, Guangdong 518055, China. E-mail: guocf@sustc.edu.cn

J.S., and F.W. contributed equally

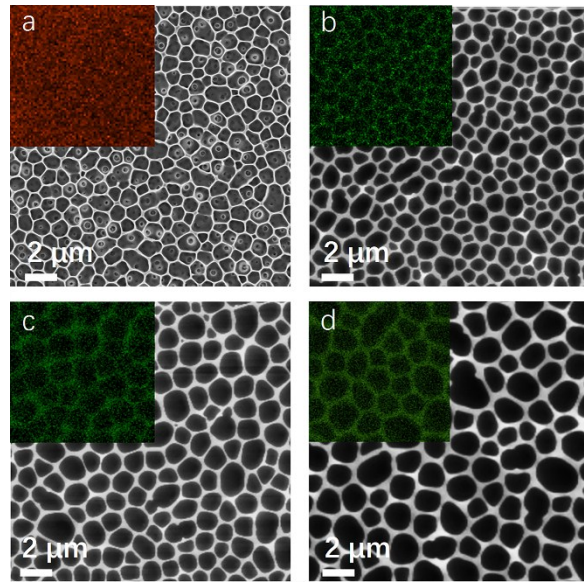

**Fig. S1** SEM images and corresponding EDS mapping (insets) results of (a) PMMA template (map of C), (b) Am-1, (c) Am-1.5, and (d) Am-2 (maps of Au).

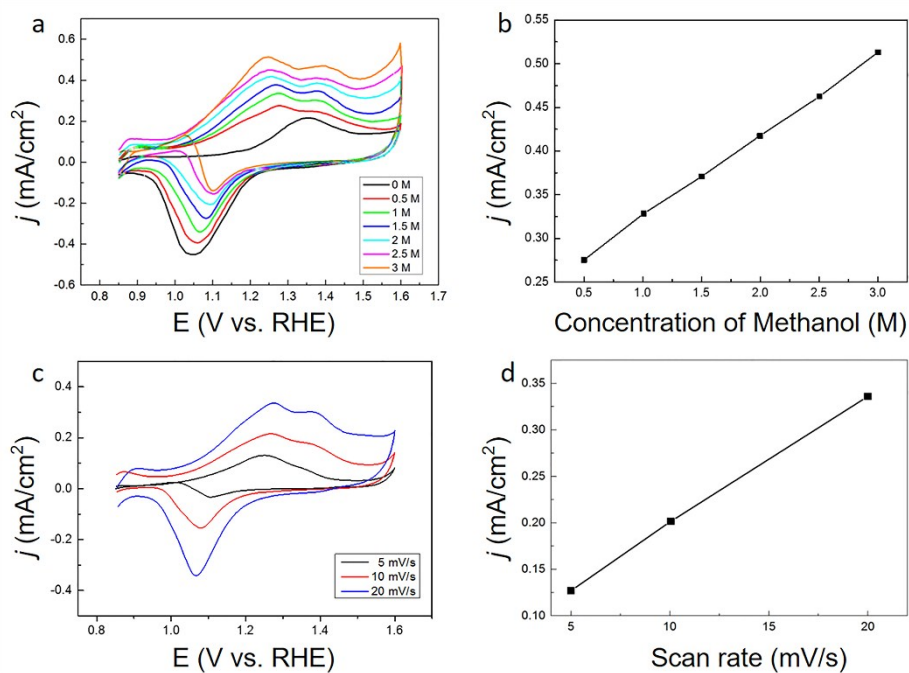

**Fig. S2** (a) Electrochemical performances of sample Am-1 in 0.5 M KOH of different methanol concentration. (b) Curve of oxidation peaks vs. methanol concentrations. (c) Electrochemical performances of sample Am-1 in 0.5 M KOH and 1 M CH<sub>3</sub>OH solution with different scan rates. (d) Curve of oxidation peaks vs. scan rates.

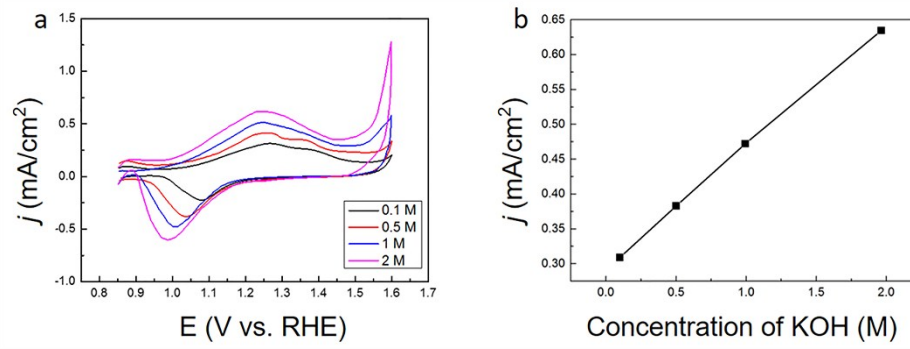

**Fig. S3** (a) Electrochemical performances of sample Am-1 in 1 M methanol with different KOH concentrations. (b) Curve of oxidation peaks vs. KOH concentrations.

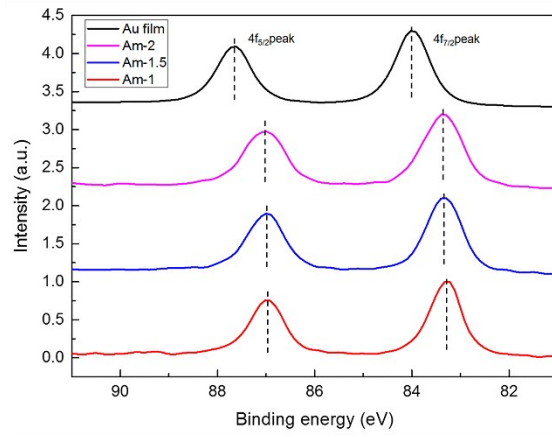

**Fig. S4** XPS measurements of a continuous Au film, Am-1, Am-1.5, and Am-2.

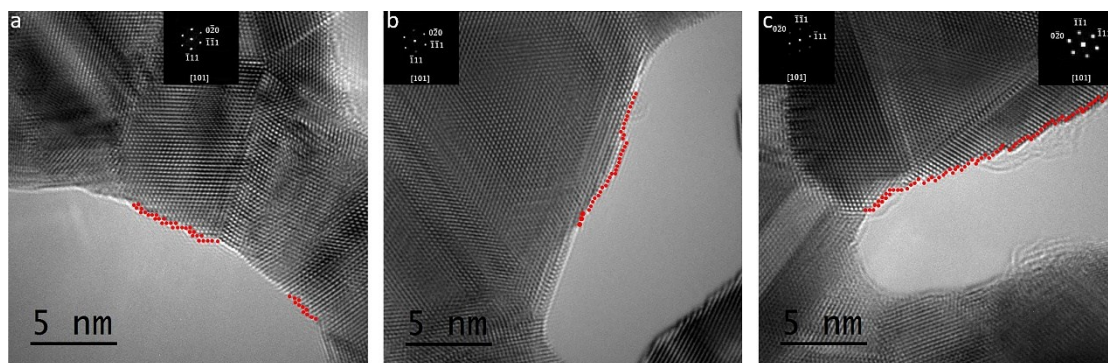

**Fig. S5** Surface atomic structure of Au micromeshes samples. Typical HRTEM images and FFT of (a) Am-1, (b) Am-1.5, and (c) Am-2 samples.

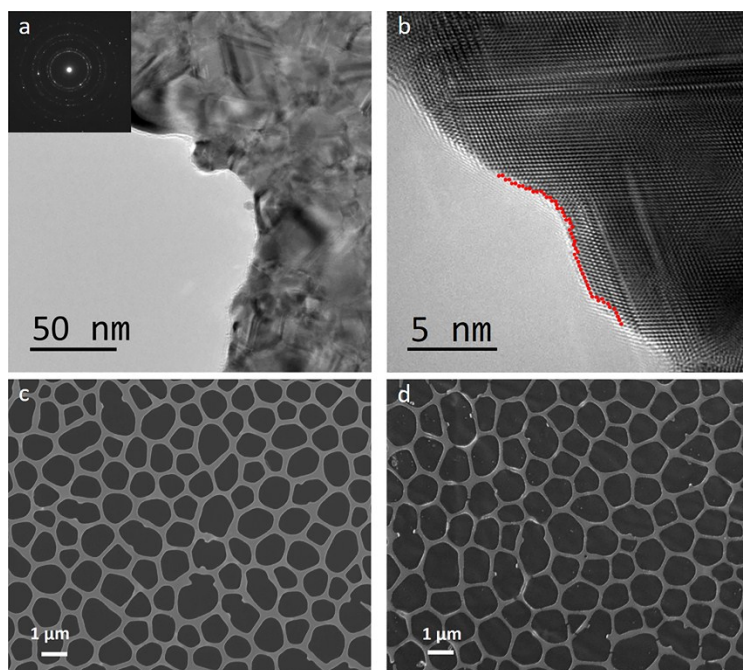

**Fig. S6** Morphology change of Au micromeshes after cycling. (a), (b) TEM images of surface facets, and defects of sample Am-1 after 500 cycles. Pore and ligament sizes of sample Am-1 (c) before and (d) after 500 cycles.

Table S1. Comparison of electro-oxidation activity among Au nanostructures.

| Catalyst                           | MOR peak current density (except background current) (mA/cm <sup>2</sup> ) | MOR peak potential (V vs RHE) | MOR onset potential (V vs RHE) (to 0.01 mA/cm <sup>2</sup> ) | Scan rate (mV/s) | Electrolyte                        | Reference |
|------------------------------------|----------------------------------------------------------------------------|-------------------------------|--------------------------------------------------------------|------------------|------------------------------------|-----------|
| Au micromeshes/PDMS                | 0.264                                                                      | 1.26                          | 0.85                                                         | 20 mV/s          | 0.5 M KOH + 1 M CH <sub>3</sub> OH | This work |
| Trisoctahedron Au nanocrystals     | 0.139                                                                      | 1.33                          | 0.925                                                        | 20 mV/s          | 0.5 M KOH + 1 M CH <sub>3</sub> OH | 1         |
| Hollow nanoporous Au nanoparticles | 0.112                                                                      | 1.27                          | 0.966                                                        | 20 mV/s          | 0.5 M KOH + 1 M CH <sub>3</sub> OH | 2         |
| Nanoporous Au                      | 0.081                                                                      | 1.30                          | 0.870                                                        | 20 mV/s          | 0.5 M KOH + 1 M CH <sub>3</sub> OH | 3         |
| Nanoporous Au freestanding films   | 0.025                                                                      | 1.35                          | 1.19                                                         | 10 mV/s          | 0.1 M KOH + 1 M CH <sub>3</sub> OH | 4         |
| Au dendrite                        | 0.062                                                                      | 1.30                          | 1.07                                                         | 10 mV/s          | 0.1 M KOH + 1 M CH <sub>3</sub> OH | 5         |
| Polycrystalline Au                 | 0.035                                                                      | 1.33                          | 1.157                                                        | 10 mV/s          | 0.1 M KOH + 1 M CH <sub>3</sub> OH | 5         |
| Dealloyed nanosponge Au particles  | 0.182                                                                      | 1.29                          | 0.94                                                         | 5 mV/s           | 0.5 M KOH + 1 M CH <sub>3</sub> OH | 6         |



## References

1. Y. Song, T. Miao, P. Zhang, C. Bi, H. Xia, D. Wang and X. Tao, *Nanoscale*, 2015, **7**, 8405-8415.
2. S. Pedireddy, H. K. Lee, W. W. Tjiu, I. Y. Phang, H. R. Tan, S. Q. Chua, C. Troadec and X. Y. Ling, *Nat. Commun.*, 2014, **5**, 4947.
3. J. Zhang, P. Liu, H. Ma and Y. Ding, *J. Phys. Chem. C*, 2007, **111**, 10382-10388.
4. H. Xia, Y. Ran, H. Z. Li, X. Tao and D. Wang, *J. Mater. Chem. A*, 2013, **1**, 4678.
5. Y. Qin, Y. Song, N. Sun, N. Zhao, M. Li and L. Qi, *Chem. Mater.*, 2008, **20**, 3965–3972.
6. G. G. Li, Y. Lin and H. Wang, *Nano Lett.*, 2016, **16**, 7248-7253.
